# Supplementary material
Source: MDPI journal article supplement (https://www.mdpi.com/2076-3271/11/1/15)
Supplement: s1 [file s1]

## Supplementary S6.

**Table S4. Expert judgements of nursing procedures for treating CIPN based on consented rounds of consensus finding**

| Treatments                               | Interventions                                                                                                                                                                           | Safety | Clinical experience                    |                         | Effort of training | Practical feasibility |
|------------------------------------------|-----------------------------------------------------------------------------------------------------------------------------------------------------------------------------------------|--------|----------------------------------------|-------------------------|--------------------|-----------------------|
|                                          |                                                                                                                                                                                         |        | Prophylactic application               | Therapeutic application |                    |                       |
|                                          |                                                                                                                                                                                         | S      | CE (x of the 6 institutions voted x/6) |                         | ET                 | PF                    |
| Phytotherapy                             | Aconit oil application                                                                                                                                                                  | S      | 1/6 apply it, E cannot be assessed     | E3 5/6                  | ET1                | PF                    |
| Phytotherapy + Rhythmical embrocation    | Aconit oil – rhythmical embrocation (e.g., hand and foot)                                                                                                                               | S      | /                                      | E 4 5/6                 | ET4                | PFt                   |
| Phytotherapy                             | Solum oil application                                                                                                                                                                   | S      | /                                      | E1 1/6                  | ET1                | PF                    |
| Movement therapy (Sensorimotor training) | Sugar oil peeling (1 tablespoon olive oil and 1 dessertspoon sugar)                                                                                                                     | S      | /                                      | E3 1/6                  | ET1                | PF                    |
| Hydrotherapy + Phytotherapy              | Alkaline bath for hand/foot, then Aconit oil application                                                                                                                                | S      | /                                      | E3 1/6                  | ET1                | PF                    |
| Phytotherapy                             | Flaxseed bath (3 tablespoons flaxseed with 2,5 l water, 5 min cooking)                                                                                                                  | S      | 1/6, E cannot be assessed              | E4 1/6                  | ET1                | PF                    |
| Phytotherapy                             | Arnica comp/Formica oil application                                                                                                                                                     | S      | 1/6, E cannot be assessed              | E3 1/6                  | ET1                | PF                    |
| Phytotherapy + Rhythmical embrocation    | Arnica comp/Formica oil – rhythmical embrocation                                                                                                                                        | S      | /                                      | E4 1/6                  | ET4                | PFt                   |
| Phytotherapy                             | Arnica comp/Formica ointment (for stronger effect of Aconit)                                                                                                                            | S      | /                                      | E3-4 1/6                | ET1                | PF                    |
| Phytotherapy                             | Rosemary ointment                                                                                                                                                                       | S      | /                                      | E3-4 1/6                | ET1                | PF                    |
| Movement therapy (Sensorimotor training) | Tactile stimulation (special naturopathic procedures: beeswax kneading, brush massage, electric toothbrush, hedgehog ball massage, needle stimulating mat, rape bath, quartz sand bath) | S      | 4/6, E cannot be assessed              | E2-3 6/6                | ET1                | PF                    |
| Cryotherapy                              | frozen gloves and socks                                                                                                                                                                 | S      | 4/6, E cannot be assessed              | /                       | ET2                | PF                    |
| Compression                              | medical gloves one size smaller than usual size                                                                                                                                         | S      | 2/6, E cannot be assessed              | /                       | ET1                | PF                    |
| Other care intervention                  | Copper ointment (0.4%) for cold feet and feelings of numbness                                                                                                                           | S      | /                                      | E2 1/6                  | ET1                | PF                    |
| Phytotherapy                             | Peppermint oil application for heat sensations and paresthesia                                                                                                                          | S      | /                                      | E2 1/6                  | ET1                | PF                    |
| Phytotherapy                             | Eucalyptus oil application for heat sensations and paresthesia                                                                                                                          | S      | /                                      | E2 1/6                  | ET1                | PF                    |
| Hydrotherapy                             | Cold knee and/or arm showers                                                                                                                                                            | S      | /                                      | E3 1/6                  | ET1                | PF                    |

**Abbreviations:** **S** = Safe; **CE** = Clinical experience (rated on a numerical scale 0 to 5 with 0 = no effect and 5 = maximum effect); **ET** = Effort of training (Education requirements in addition to a nursing grade; 0 = no additional instructions or education needed; 1 = instructions needed, 2 = application under guidance, 3 = repeated practice needed, 4 = basic training of Rhythmical embrocation (200 hours) recommended, but partial skills can be acquired with less than 200 hours, 5 = basic training of Rhythmical embrocation (200 hours) needed; **PF** = Practical Feasibility (PFt = feasibility limited due to time requirements; PFt = feasibility strongly limited due to time requirements; PFC = feasibility limited due to high costs (> 30 € per month))
